# Supplementary material
Source: MDPI journal article supplement (https://www.mdpi.com/1424-2818/15/4/477)

## Supplementary Information

**Figure S1.** Alignment of all the Haplosporidian 18S rRNA sequences available at NCBI up to 31.01.2023.

The first three lines represents forward, probe and reverse (in its reverse complement) Hp\_CM primers, respectively. With black background are reported the 100% conserved site in respect to the Hp\_CM system.

| Species/Abbrv | 1. Hp_CM_F | 2. Hp_CM_probe | 3. Hp_CM_rc | 4. LC38065_Haplosporidium pinnae | 5. MK142774_Haplosporidium pinnae | 6. MK142775_Haplosporidium pinnae | 7. MK142776_Haplosporidium pinnae | 8. MK142777_Haplosporidium pinnae | 9. MK142779_Haplosporidium pinnae | 10. MK142779_Haplosporidium pinnae | 11. MK143171_Haplosporidium pinnae | 12. MK143170_Haplosporidium pinnae | 13. MK255604_Haplosporidium pinnae | 14. MK143164_Haplosporidium pinnae | 15. MK143165_Haplosporidium pinnae | 16. MK143162_Haplosporidium pinnae | 17. MK143163_Haplosporidium pinnae | 18. MK1367896_Haplosporidium pinnae | 19. MK143161_Haplosporidium pinnae | 20. MK143166_Haplosporidium pinnae | 21. MK143169_Haplosporidium pinnae | 22. MK143167_Haplosporidium pinnae | 23. MK143168_Haplosporidium pinnae | 24. MK143174_Haplosporidium pinnae | 25. MK143178_Haplosporidium pinnae | 26. MK143175_Haplosporidium pinnae | 27. MK143180_Haplosporidium pinnae | 28. MK143177_Haplosporidium pinnae | 29. MK143181_Haplosporidium pinnae | 30. MK143182_Haplosporidium pinnae | 31. MK143179_Haplosporidium pinnae | 32. MK143183_Haplosporidium pinnae | 33. MK143172_Haplosporidium pinnae | 34. MK143176_Haplosporidium pinnae | 35. MK155820_Haplosporidium pinnae | 36. MK143184_Haplosporidium pinnae | 37. MK155821_Haplosporidium pinnae | 38. MK143186_Haplosporidium pinnae | 39. MK143187_Haplosporidium pinnae | 40. MK143185_Haplosporidium pinnae | 41. MK1642061_Haplosporidium pinnae | 42. MK155819_Haplosporidium pinnae | 43. MK155822_Haplosporidium pinnae | 44. MK143173_Haplosporidium pinnae | 45. MK143173_Haplosporidium pinnae | 46. AY449713_Haplosporidium pustulanicum | 47. KJ334587_Haplosporidium pustulanicum | 48. AY452724_Haplosporidium pustulanicum | 49. DQ455793_Haplosporidium edule | 50. HQ176468_Haplosporidium rabei | 51. HQ176469_Haplosporidium rabei | 52. KP378734_Haplosporidium diporeiae | 53. JN363430_Haplosporidium tuxiensis | 54. JX150289_Haplosporidium littoralis | 55. JX185413_Haplosporidium littoralis | 56. JX977120_Haplosporidium sp. ex s. glomerata | 57. AY181716_Haplosporidium sp. | 58. KF193606_Uncultured haplosporidian | 59. MF621965_Haplosporidium sp. | 60. MK070859_Haplosporidium sp. | 61. MK913656_Haplosporidium orchiestiae | 62. MK913664_Haplosporidium orchiestiae | 63. MK913665_Haplosporidium orchiestiae | 64. MK913666_Haplosporidium orchiestiae | 65. MK913667_Haplosporidium orchiestiae | 66. MK913668_Haplosporidium orchiestiae | 67. MK913657_Haplosporidium echinogammar | 68. MK913659_Haplosporidium echinogammar | 69. MK913660_Haplosporidium echinogammar | 70. MK913661_Haplosporidium echinogammar | 71. MK913662_Haplosporidium echinogammar | 72. MK913663_Haplosporidium echinogammar | 73. MK913664_Haplosporidium echinogammar | 74. MK913665_Haplosporidium echinogammar | 75. MK913666_Haplosporidium echinogammar | 76. MK913667_Haplosporidium echinogammar | 77. MK913668_Haplosporidium echinogammar | 78. MK913669_Haplosporidium echinogammar | 79. MK913670_Haplosporidium echinogammar | 80. MK913671_Haplosporidium echinogammar | 81. MK913672_Haplosporidium echinogammar | 82. MK913673_Haplosporidium echinogammar | 83. MK913674_Haplosporidium echinogammar | 84. MK913675_Haplosporidium echinogammar | 85. MK913676_Haplosporidium echinogammar | 86. MK913677_Haplosporidium echinogammar | 87. MK913678_Haplosporidium echinogammar | 88. MK913679_Haplosporidium echinogammar | 89. MK913680_Haplosporidium echinogammar | 90. MK913681_Haplosporidium echinogammar | 91. MK913682_Haplosporidium echinogammar | 92. MK913683_Haplosporidium echinogammar | 93. MK913684_Haplosporidium echinogammar | 94. MK913685_Haplosporidium echinogammar | 95. MK913686_Haplosporidium echinogammar | 96. MK913687_Haplosporidium echinogammar | 97. MK913688_Haplosporidium echinogammar | 98. MK913689_Haplosporidium echinogammar | 99. MK913690_Haplosporidium echinogammar | 100. U20858_Haplosporidium costale | 101. U47851.2_Haplosporidium louisiana | 102. A8005957_Haplosporidium nelsoni | 103. X743131_Haplosporidium nelsoni | 104. X743124_Haplosporidium nelsoni | 105. X743125_Haplosporidium nelsoni | 106. KP378010_Haplosporidium costale | 107. KP378122_Haplosporidium costale | 108. MZ666334_Haplosporidium costale | 109. MZ666335_Haplosporidium costale | 110. U20858_Haplosporidium costale | 111. U47851.2_Haplosporidium louisiana | 112. A8005957_Haplosporidium nelsoni | 113. X743131_Haplosporidium nelsoni | 114. X743124_Haplosporidium nelsoni | 115. X743125_Haplosporidium nelsoni | 116. KP378010_Haplosporidium costale | 117. KP378122_Haplosporidium costale | 118. MZ666334_Haplosporidium costale | 119. MZ666335_Haplosporidium costale | 120. U20858_Haplosporidium costale | 121. U47851.2_Haplosporidium louisiana | 122. A8005957_Haplosporidium nelsoni | 123. X743131_Haplosporidium nelsoni | 124. X743124_Haplosporidium nelsoni | 125. X743125_Haplosporidium nelsoni | 126. KP378010_Haplosporidium costale | 127. KP378122_Haplosporidium costale | 128. MZ666334_Haplosporidium costale | 129. MZ666335_Haplosporidium costale | 130. U20858_Haplosporidium costale | 131. U47851.2_Haplosporidium louisiana | 132. A8005957_Haplosporidium nelsoni | 133. X743131_Haplosporidium nelsoni | 134. X743124_Haplosporidium nelsoni | 135. X743125_Haplosporidium nelsoni | 136. KP378010_Haplosporidium costale | 137. KP378122_Haplosporidium costale | 138. MZ666334_Haplosporidium costale | 139. MZ666335_Haplosporidium costale | 140. U20858_Haplosporidium costale | 141. U47851.2_Haplosporidium louisiana | 142. A8005957_Haplosporidium nelsoni | 143. X743131_Haplosporidium nelsoni | 144. X743124_Haplosporidium nelsoni | 145. X743125_Haplosporidium nelsoni | 146. KP378010_Haplosporidium costale | 147. KP378122_Haplosporidium costale | 148. MZ666334_Haplosporidium costale | 149. MZ666335_Haplosporidium costale | 150. U20858_Haplosporidium costale | 151. U47851.2_Haplosporidium louisiana | 152. A8005957_Haplosporidium nelsoni | 153. X743131_Haplosporidium nelsoni | 154. X743124_Haplosporidium nelsoni | 155. X743125_Haplosporidium nelsoni | 156. KP378010_Haplosporidium costale | 157. KP378122_Haplosporidium costale | 158. MZ666334_Haplosporidium costale | 159. MZ666335_Haplosporidium costale | 160. U20858_Haplosporidium costale | 161. U47851.2_Haplosporidium louisiana | 162. A8005957_Haplosporidium nelsoni | 163. X743131_Haplosporidium nelsoni | 164. X743124_Haplosporidium nelsoni | 165. X743125_Haplosporidium nelsoni | 166. KP378010_Haplosporidium costale | 167. KP378122_Haplosporidium costale | 168. MZ666334_Haplosporidium costale | 169. MZ666335_Haplosporidium costale | 170. U20858_Haplosporidium costale | 171. U47851.2_Haplosporidium louisiana | 172. A8005957_Haplosporidium nelsoni | 173. X74313 |
|---------------|------------|----------------|-------------|----------------------------------|-----------------------------------|-----------------------------------|-----------------------------------|-----------------------------------|-----------------------------------|------------------------------------|------------------------------------|------------------------------------|------------------------------------|------------------------------------|------------------------------------|------------------------------------|------------------------------------|-------------------------------------|------------------------------------|------------------------------------|------------------------------------|------------------------------------|------------------------------------|------------------------------------|------------------------------------|------------------------------------|------------------------------------|------------------------------------|------------------------------------|------------------------------------|------------------------------------|------------------------------------|------------------------------------|------------------------------------|------------------------------------|------------------------------------|------------------------------------|------------------------------------|------------------------------------|------------------------------------|-------------------------------------|------------------------------------|------------------------------------|------------------------------------|------------------------------------|------------------------------------------|------------------------------------------|------------------------------------------|-----------------------------------|-----------------------------------|-----------------------------------|---------------------------------------|---------------------------------------|----------------------------------------|----------------------------------------|-------------------------------------------------|---------------------------------|----------------------------------------|---------------------------------|---------------------------------|-----------------------------------------|-----------------------------------------|-----------------------------------------|-----------------------------------------|-----------------------------------------|-----------------------------------------|------------------------------------------|------------------------------------------|------------------------------------------|------------------------------------------|------------------------------------------|------------------------------------------|------------------------------------------|------------------------------------------|------------------------------------------|------------------------------------------|------------------------------------------|------------------------------------------|------------------------------------------|------------------------------------------|------------------------------------------|------------------------------------------|------------------------------------------|------------------------------------------|------------------------------------------|------------------------------------------|------------------------------------------|------------------------------------------|------------------------------------------|------------------------------------------|------------------------------------------|------------------------------------------|------------------------------------------|------------------------------------------|------------------------------------------|------------------------------------------|------------------------------------------|------------------------------------------|------------------------------------------|------------------------------------|----------------------------------------|--------------------------------------|-------------------------------------|-------------------------------------|-------------------------------------|--------------------------------------|--------------------------------------|--------------------------------------|--------------------------------------|------------------------------------|----------------------------------------|--------------------------------------|-------------------------------------|-------------------------------------|-------------------------------------|--------------------------------------|--------------------------------------|--------------------------------------|--------------------------------------|------------------------------------|----------------------------------------|--------------------------------------|-------------------------------------|-------------------------------------|-------------------------------------|--------------------------------------|--------------------------------------|--------------------------------------|--------------------------------------|------------------------------------|----------------------------------------|--------------------------------------|-------------------------------------|-------------------------------------|-------------------------------------|--------------------------------------|--------------------------------------|--------------------------------------|--------------------------------------|------------------------------------|----------------------------------------|--------------------------------------|-------------------------------------|-------------------------------------|-------------------------------------|--------------------------------------|--------------------------------------|--------------------------------------|--------------------------------------|------------------------------------|----------------------------------------|--------------------------------------|-------------------------------------|-------------------------------------|-------------------------------------|--------------------------------------|--------------------------------------|--------------------------------------|--------------------------------------|------------------------------------|----------------------------------------|--------------------------------------|-------------------------------------|-------------------------------------|-------------------------------------|--------------------------------------|--------------------------------------|--------------------------------------|--------------------------------------|------------------------------------|----------------------------------------|--------------------------------------|-------------|
|---------------|------------|----------------|-------------|----------------------------------|-----------------------------------|-----------------------------------|-----------------------------------|-----------------------------------|-----------------------------------|------------------------------------|------------------------------------|------------------------------------|------------------------------------|------------------------------------|------------------------------------|------------------------------------|------------------------------------|-------------------------------------|------------------------------------|------------------------------------|------------------------------------|------------------------------------|------------------------------------|------------------------------------|------------------------------------|------------------------------------|------------------------------------|------------------------------------|------------------------------------|------------------------------------|------------------------------------|------------------------------------|------------------------------------|------------------------------------|------------------------------------|------------------------------------|------------------------------------|------------------------------------|------------------------------------|------------------------------------|-------------------------------------|------------------------------------|------------------------------------|------------------------------------|------------------------------------|------------------------------------------|------------------------------------------|------------------------------------------|-----------------------------------|-----------------------------------|-----------------------------------|---------------------------------------|---------------------------------------|----------------------------------------|----------------------------------------|-------------------------------------------------|---------------------------------|----------------------------------------|---------------------------------|---------------------------------|-----------------------------------------|-----------------------------------------|-----------------------------------------|-----------------------------------------|-----------------------------------------|-----------------------------------------|------------------------------------------|------------------------------------------|------------------------------------------|------------------------------------------|------------------------------------------|------------------------------------------|------------------------------------------|------------------------------------------|------------------------------------------|------------------------------------------|------------------------------------------|------------------------------------------|------------------------------------------|------------------------------------------|------------------------------------------|------------------------------------------|------------------------------------------|------------------------------------------|------------------------------------------|------------------------------------------|------------------------------------------|------------------------------------------|------------------------------------------|------------------------------------------|------------------------------------------|------------------------------------------|------------------------------------------|------------------------------------------|------------------------------------------|------------------------------------------|------------------------------------------|------------------------------------------|------------------------------------------|------------------------------------|----------------------------------------|--------------------------------------|-------------------------------------|-------------------------------------|-------------------------------------|--------------------------------------|--------------------------------------|--------------------------------------|--------------------------------------|------------------------------------|----------------------------------------|--------------------------------------|-------------------------------------|-------------------------------------|-------------------------------------|--------------------------------------|--------------------------------------|--------------------------------------|--------------------------------------|------------------------------------|----------------------------------------|--------------------------------------|-------------------------------------|-------------------------------------|-------------------------------------|--------------------------------------|--------------------------------------|--------------------------------------|--------------------------------------|------------------------------------|----------------------------------------|--------------------------------------|-------------------------------------|-------------------------------------|-------------------------------------|--------------------------------------|--------------------------------------|--------------------------------------|--------------------------------------|------------------------------------|----------------------------------------|--------------------------------------|-------------------------------------|-------------------------------------|-------------------------------------|--------------------------------------|--------------------------------------|--------------------------------------|--------------------------------------|------------------------------------|----------------------------------------|--------------------------------------|-------------------------------------|-------------------------------------|-------------------------------------|--------------------------------------|--------------------------------------|--------------------------------------|--------------------------------------|------------------------------------|----------------------------------------|--------------------------------------|-------------------------------------|-------------------------------------|-------------------------------------|--------------------------------------|--------------------------------------|--------------------------------------|--------------------------------------|------------------------------------|----------------------------------------|--------------------------------------|-------------|

**Figure S2.** Standard curve plot on Inhibition test done with IAC 1. On y-axis the quantitative cycles (Cq), on x-axis the Log of the starting quantity of each dilution, as circle the serial dilution of IAC 1, red cross indicates IAC 1 with the sample F8 and blue cross is the IAC 1 with the F6 sample. E= reaction efficiency, R<sup>2</sup>= coefficient of determination and y-int = y intercept. Figure edited with Maestro software (Bio Rad).

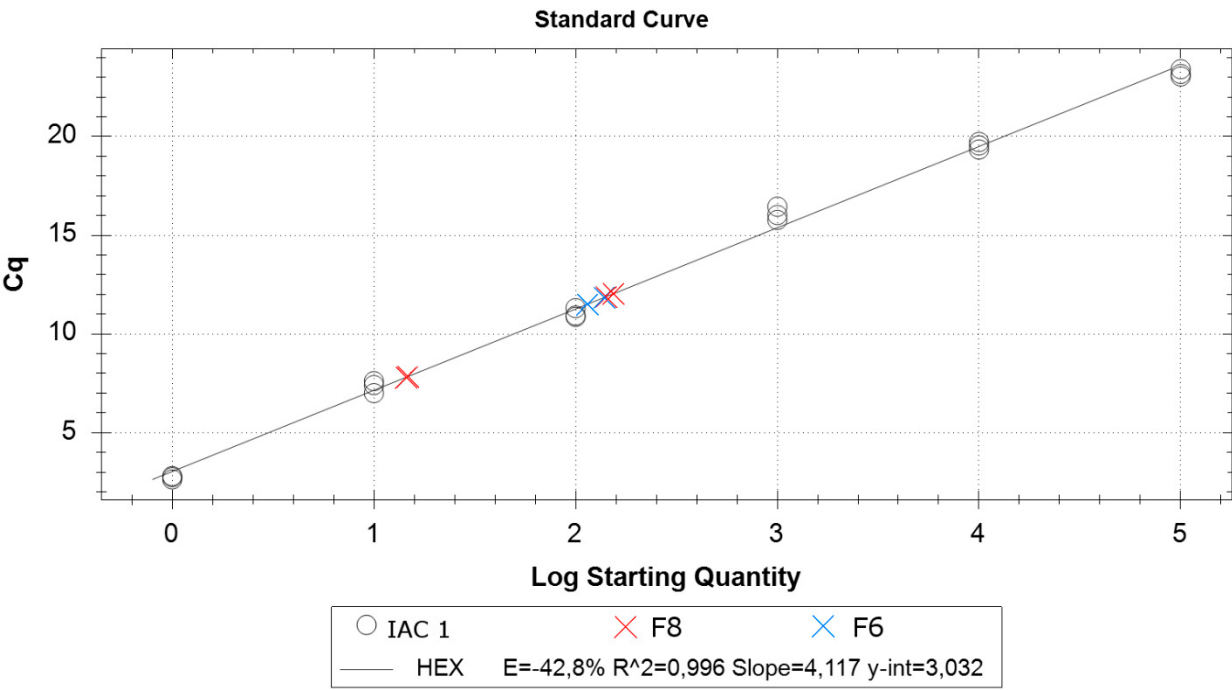

**Figure S3.** Confirmation of the identity of the sequenced amplicon from sample F8. Alignment of Sanger-sequenced sample F8 compared with representatives of *Haplosporidium* spp sequences along with the oligonucleotides (reverse as reverse complement) and probe forming the Hp\_CM assay.

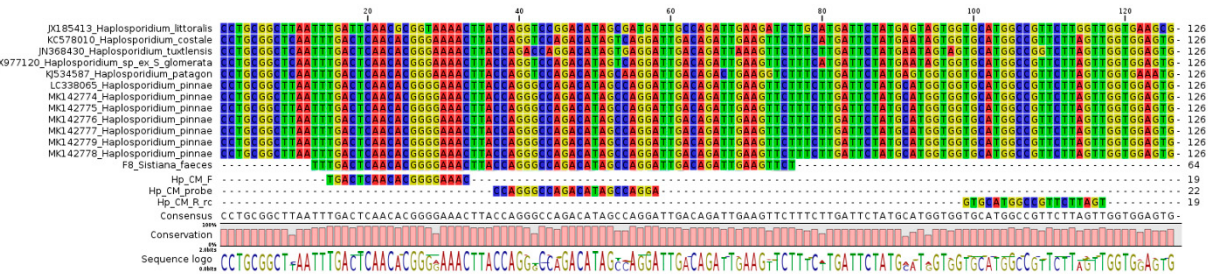

Supplement: s1 [file s1]
